# Supplementary material for: Machine learning reveals limited predictive value of clinical factors for asthma exacerbations: insights from a real-world study
Source: Research Square preprint supplement (doi:10.21203/rs.3.rs-6664347/v1), 2025-07-10
Supplement: Supplementary file 1 [file 3268d5a89108f231c3f3d993.pdf]

# Risk factors for asthma exacerbation severity and clinical outcomes: a retrospective cohort analysis

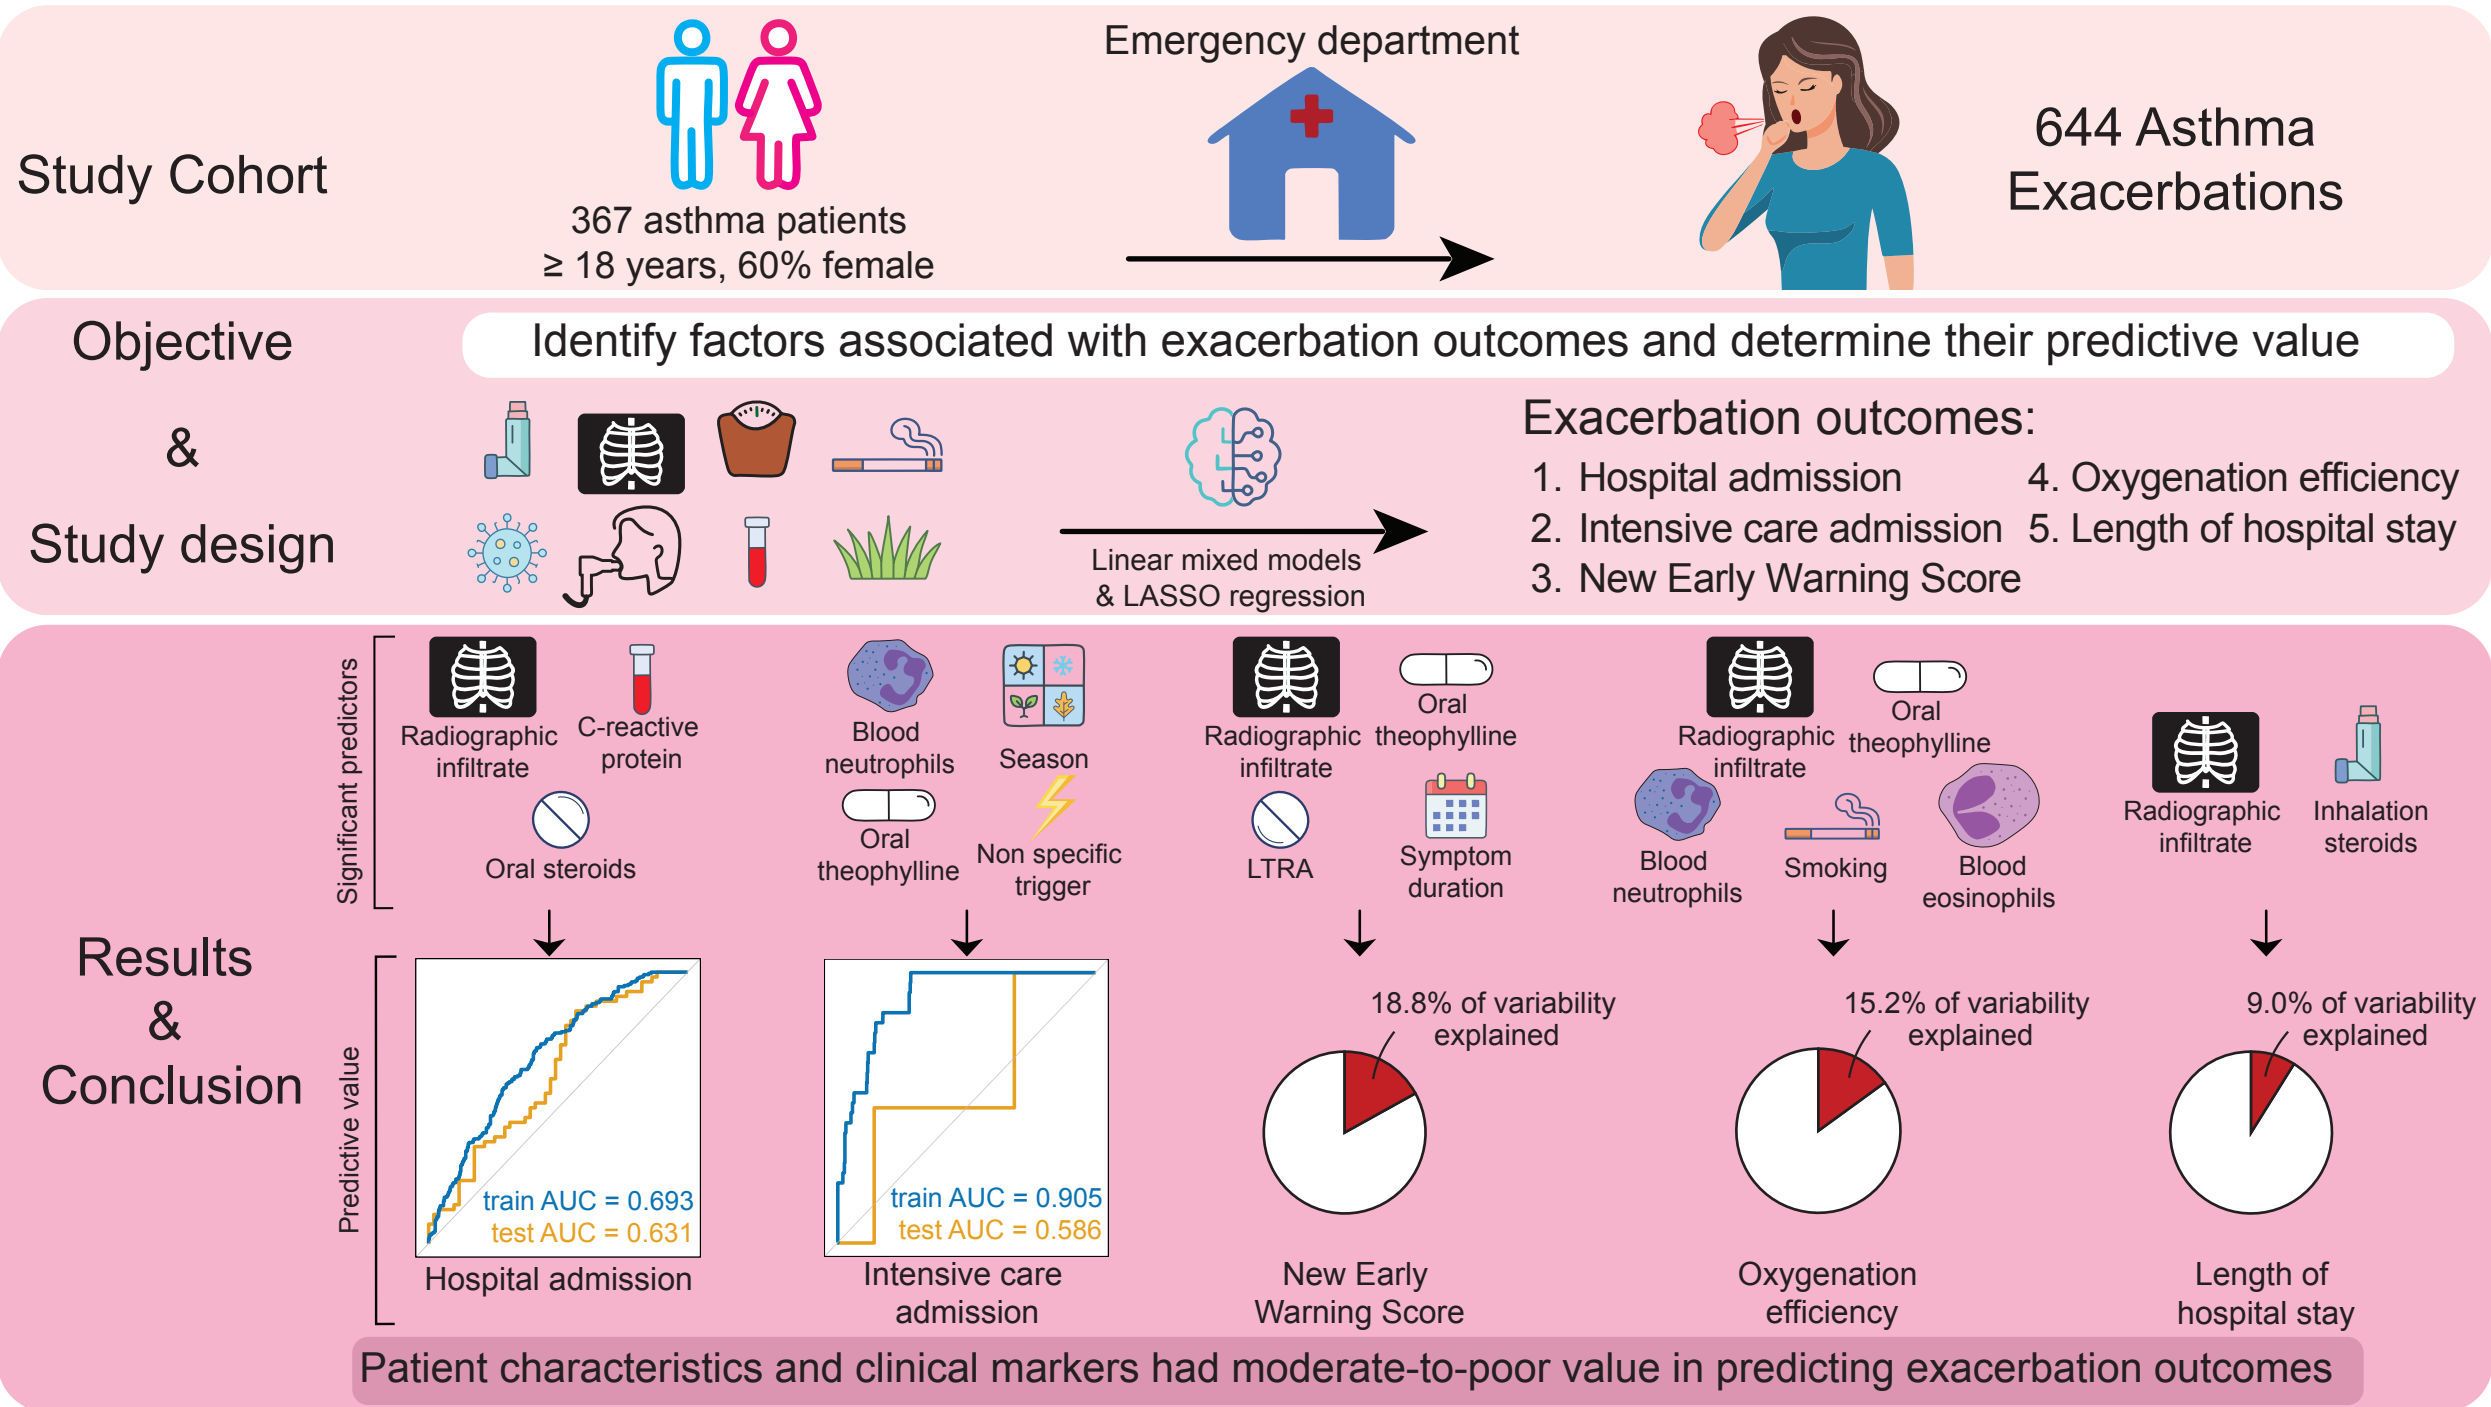



Radiographic infiltrate



Inhalation steroids



9.0% of variability explained

Length of hospital stay

Patient characteristics and clinical markers had moderate-to-poor value in predicting exacerbation outcomes

AUC = Area under the curve; LASSO = Least absolute shrinkage and selection operator; LTRA = Leukotriene receptor antagonist
